# Supplementary material
Source: PubMed Central journal article supplement (PMC5437815)
Supplement: EMBJ-36-425-s001.pdf [file EMBJ-36-425-s001.pdf]

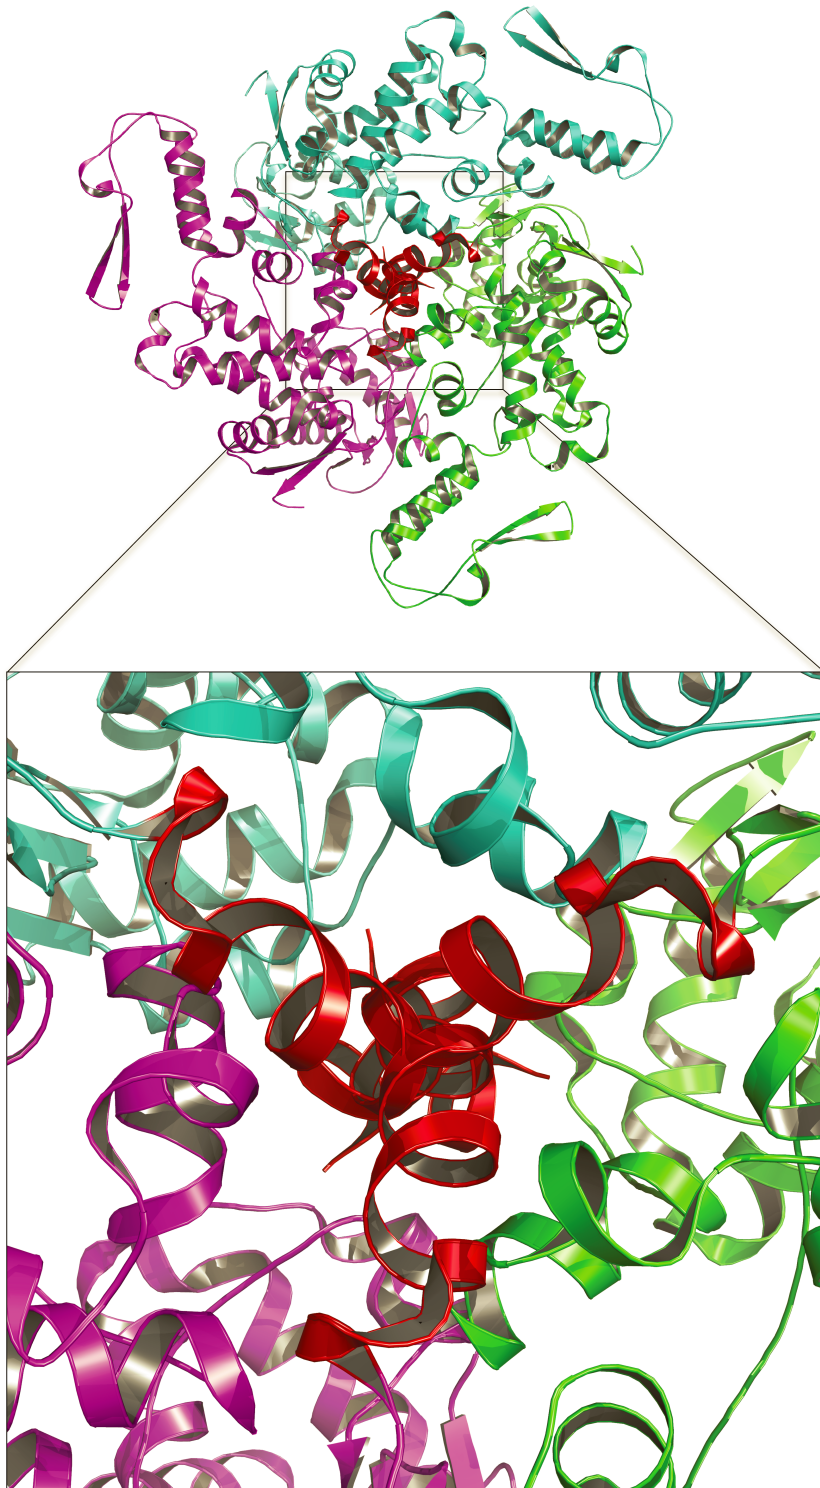

**Appendix Figure S1. Clashing of the  $\alpha 1$  helices at the interface of the trimeric model of Rsp5-HECT domains.**

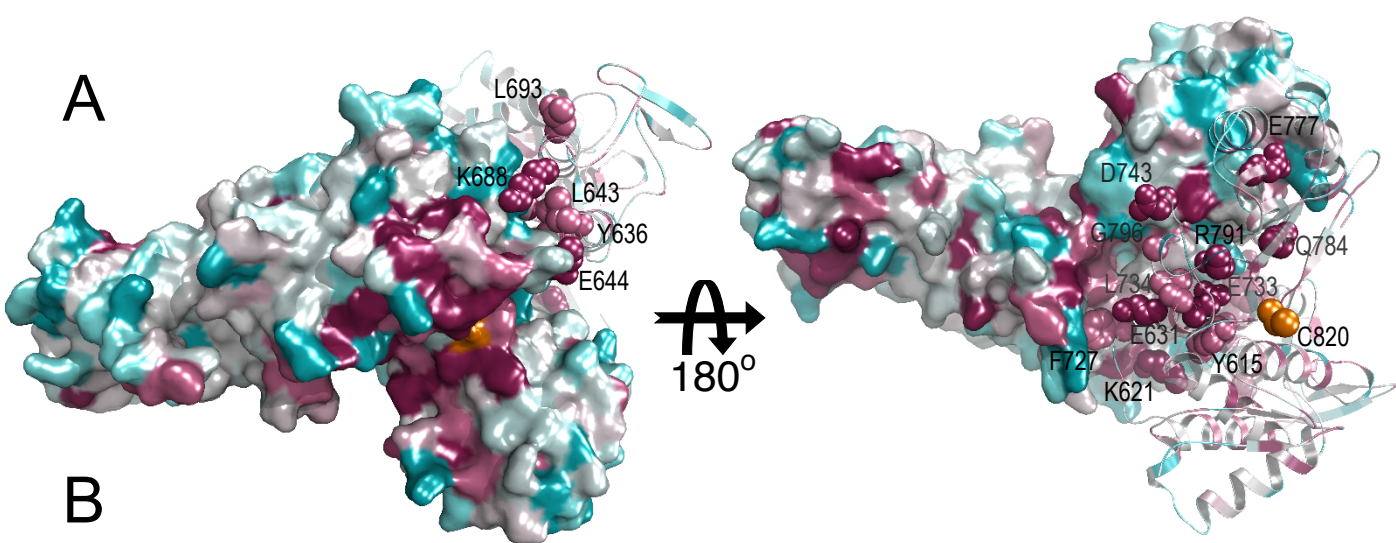

|       |    |   |   |   |   |   |   |   |   |   |    |    |     |    |   |   |   |   |    |    |   |   |   |   |   |   |   |   |   |   |   |   |   |   |   |   |    |    |    |    |   |   |   |    |    |    |    |     |     |     |     |
|-------|----|---|---|---|---|---|---|---|---|---|----|----|-----|----|---|---|---|---|----|----|---|---|---|---|---|---|---|---|---|---|---|---|---|---|---|---|----|----|----|----|---|---|---|----|----|----|----|-----|-----|-----|-----|
| RSP5  | P  | G | Q | C | H | I | K | V | R | R | K  | N  | I   | F  | E | D | A | Y | Q  | -- | E | I | M | R | Q | T | P | E | D | - | L | K | K | R | L | M | I  | K  | F  | D  | G | E | E | -- | -- | -- | -- | 492 |     |     |     |
| E6AP  | N  | P | Y | L | R | L | K | V | R | R | D  | H  | I   | I  | D | D | A | L | V  | R  | L | E | M | I | A | M | E | N | P | A | D | L | K | K | Q | L | Y  | V  | E  | F  | E | G | E | Q  | Q  | V  | D  | E   | G   | G   | 546 |
| NEDD4 | P  | N | K | F | E | M | K | L | R | R | A  | T  | V   | L  | E | D | S | Y | R  | -- | R | I | M | G | V | K | R | A | D | F | L | K | A | R | L | W | I  | E  | F  | D  | G | E | K | G  | L  | D  | Y  | G   | G   | 587 |     |
| RSP5  | -- | R | E | F | F | F | L | S | H | E | M  | F  | N   | P  | F | Y | C | L | F  | E  | Y | S | A | Y | D | N | Y | T | I | Q | I | N | P | N | S | G | I  | N  | -  | P  | E | H | L | N  | Y  | F  | K  | F   | 547 |     |     |
| E6AP  | V  | S | K | E | F | F | Q | L | V | V | E  | E  | I   | F  | N | P | D | I | G  | M  | F | T | Y | D | E | S | T | K | L | F | W | F | N | P | S | S | -- | -- | -- | -- | F | E | T | E  | G  | Q  | F  | T   | L   | 591 |     |
| NEDD4 | V  | A | R | E | W | F | F | L | I | S | K  | E  | M   | F  | N | P | Y | Y | G  | L  | F | E | Y | S | A | T | D | N | Y | T | I | Q | I | N | P | N | S  | G  | L  | C  | N | E | D | H  | L  | S  | Y  | F   | K   | F   | 637 |
| RSP5  | I  | G | R | V | V | G | L | G | V | F | H  | R  | R   | F  | L | D | A | F | F  | V  | G | A | L | Y | K | M | M | L | R | K | K | V | V | L | Q | D | M  | E  | G  | V  | D | A | E | V  | Y  | N  | S  | L   | N   | W   | 597 |
| E6AP  | I  | G | I | V | L | G | L | A | I | Y | N  | N  | C   | I  | L | D | V | H | F  | P  | M | V | Y | R | K | L | M | G | K | K | G | T | F | R | D | L | G  | D  | S  | H  | P | V | L | Y  | Q  | S  | L  | K   | D   | 641 |     |
| NEDD4 | I  | G | R | V | A | G | M | A | V | Y | H  | G  | K   | L  | L | D | G | F | F  | I  | R | P | F | Y | K | M | M | L | H | K | P | I | T | L | H | D | M  | E  | S  | V  | D | S | E | Y  | Y  | N  | S  | L   | R   | W   | 687 |
| RSP5  | M  | L | E | N | S | I | D | G | V | L | D  | L  | T   | F  | S | A | D | D | -- | E  | R | F | G | E | V | V | T | V | D | L | K | P | D | G | R | N | I  | E  | V  | T  | D | G | N | K  | K  | E  | Y  | V   | 644 |     |     |
| E6AP  | L  | L | E | Y | E | G | N | V | E | D | D  | M  | M   | I  | T | F | Q | I | S  | Q  | T | D | L | F | G | N | P | M | M | Y | D | L | K | E | N | G | D  | K  | I  | P  | I | T | N | E  | N  | R  | K  | E   | F   | V   | 691 |
| NEDD4 | I  | L | E | N | D | P | T | - | E | L | D  | L  | R   | F  | I | I | D | E | -- | E  | L | F | G | Q | T | H | Q | H | E | L | K | N | G | S | R | I | V  | V  | T  | N  | K | N | K | K  | E  | Y  | I  | 733 |     |     |     |
| RSP5  | E  | L | Y | T | Q | W | R | I | V | D | R  | V  | Q   | E  | Q | F | K | A | F  | M  | D | G | F | N | E | L | I | P | E | D | - | L | V | T | V | F | D  | E  | R  | E  | L | E | L | I  | G  | G  | I  | A   | E   | 693 |     |
| E6AP  | N  | L | Y | S | D | Y | I | L | N | K | S  | V  | E   | K  | Q | F | K | A | F  | R  | R | G | F | H | M | V | T | N | E | S | P | L | K | Y | L | F | R  | P  | E  | E  | I | E | L | L  | I  | C  | G  | S   | R   | N   | 741 |
| NEDD4 | Y  | L | V | I | Q | W | R | E | V | N | R  | I  | Q   | K  | Q | M | A | A | F  | K  | E | G | F | E | E | L | I | P | Q | D | - | L | I | K | I | F | D  | E  | N  | E  | L | E | L | M  | C  | G  | L  | G   | D   | 782 |     |
| RSP5  | I  | D | I | E | D | W | K | K | H | T | D  | Y  | R   | -  | G | Y | Q | E | S  | D  | E | V | I | Q | W | F | W | K | C | V | S | E | W | D | N | E | Q  | R  | A  | R  | L | L | Q | F  | T  | T  | G  | T   | S   | R   | 742 |
| E6AP  | L  | D | F | Q | A | L | E | E | T | T | E  | Y  | D   | G  | Y | T | R | D | S  | V  | L | I | R | E | F | W | E | I | V | H | S | F | T | D | E | Q | K  | R  | L  | F  | L | Q | F | T  | T  | G  | T  | D   | R   | 791 |     |
| NEDD4 | V  | D | V | N | D | W | R | E | H | T | K  | Y  | K   | N  | G | Y | S | A | N  | H  | Q | V | I | Q | W | F | W | K | A | V | L | M | M | D | S | E | K  | R  | I  | R  | L | L | Q | F  | V  | T  | G  | T   | S   | R   | 832 |
| RSP5  | I  | P | V | N | G | F | K | D | L | Q | G  | S  | D   | G  | P | R | R | F | T  | I  | E | K | A | G | E | V | Q | Q | L | P | K | S | H | T | C | F | N  | R  | V  | D  | L | P | Q | Y  | V  | D  | Y  | D   | S   | M   | 792 |
| E6AP  | A  | P | V | G | L | L | G | K | L | K | -- | -- | --  | -- | M | I | I | A | K  | N  | G | P | D | T | E | R | L | P | T | S | H | T | C | F | N | V | L  | L  | L  | P  | E | Y | S | S  | K  | E  | K  | L   | 835 |     |     |
| NEDD4 | V  | P | M | N | G | F | A | E | L | Y | G  | S  | N   | G  | P | Q | S | F | T  | V  | E | Q | W | G | T | P | E | K | L | P | R | A | H | T | C | F | N  | R  | L  | D  | L | P | F | Y  | E  | S  | F  | E   | L   | 882 |     |
| RSP5  | K  | Q | K | L | T | L | A | V | E | E | T  | I  | 804 |    |   |   |   |   |    |    |   |   |   |   |   |   |   |   |   |   |   |   |   |   |   |   |    |    |    |    |   |   |   |    |    |    |    |     |     |     |     |
| E6AP  | K  | E | R | L | L | K | A | I | T | Y | A  | -  | 846 |    |   |   |   |   |    |    |   |   |   |   |   |   |   |   |   |   |   |   |   |   |   |   |    |    |    |    |   |   |   |    |    |    |    |     |     |     |     |
| NEDD4 | W  | D | K | L | Q | M | A | I | E | N | T  | Q  | 893 |    |   |   |   |   |    |    |   |   |   |   |   |   |   |   |   |   |   |   |   |   |   |   |    |    |    |    |   |   |   |    |    |    |    |     |     |     |     |

**Appendix Figure S2. Conservation of E6AP interface residues.** (A) Two out of three protomers (surface and cartoon representation) illustrate surface residue conservation of the trimeric structure, in two angles rotated around the X axis. We submitted E6AP structure (PDB 1C4Z) to the ConSurf server (Landau et al. 2005). Residues are coloured by conservation scale ranging from unconserved (blue) too highly conserved (bourdeaux). Catalytic cysteines are shown in orange, and interface residues are depicted as spheres. (B) Corresponding sequence alignment.

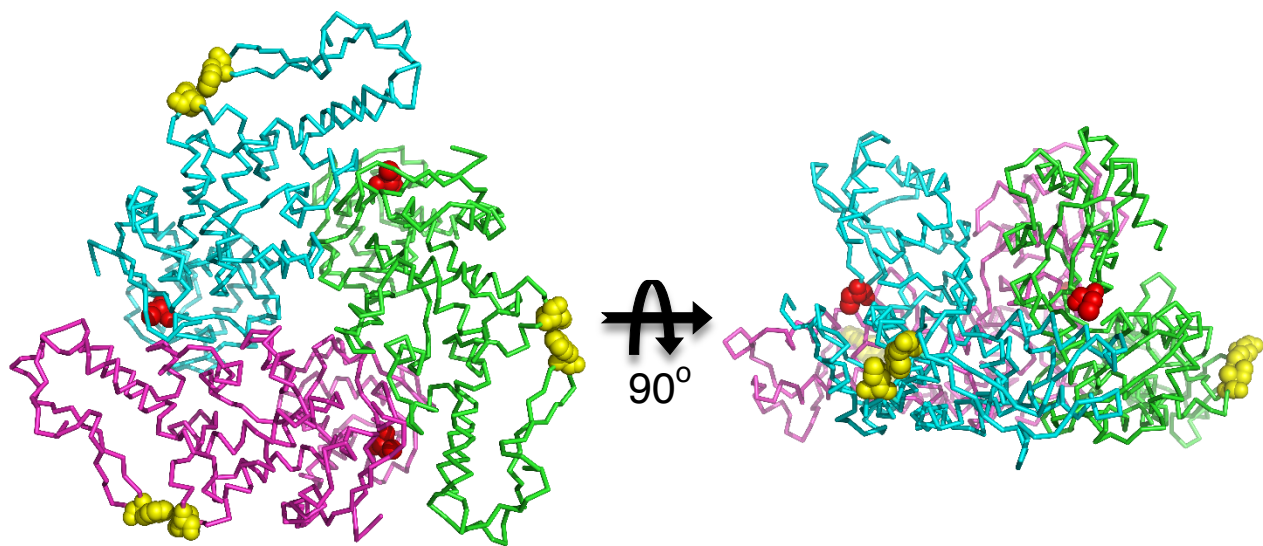

**Appendix Figure S3 . Representation of E2 binding (yellow) residues and catalytic cysteines (red) in the Rsp5 trimeric model.**
